# Supplementary material for: Differential Activity of the Extracellular Phenoloxidases in Different Strains of the Phytopathogenic Fungus, Microdochium nivale
Source: MDPI journal article supplement (doi:10.3390/jof8090918), 2022-08-29
Supplement: s1 [file s1]

Table S2. Virulence of *Microdochium nivale* strains assessed based on the weight of the roots of infected plants (winter rye (*Secale cereale* L.) cultivar Ogonek) compared to non-infected plants (Gorshkov et al., 2020). The values show the percentage of root weight of infected plants compared to control. Highly virulent strains are marked by a yellow background.

| Strain №                      | Percentage of root weight of infected plants compared to control, % |
|-------------------------------|---------------------------------------------------------------------|
| <i>Microdochium nivale</i> 1  | 18.6                                                                |
| <i>Microdochium nivale</i> 2  | 88.7                                                                |
| <i>Microdochium nivale</i> 3  | 61.9                                                                |
| <i>Microdochium nivale</i> 4  | 75.3                                                                |
| <i>Microdochium nivale</i> 5  | 19.5                                                                |
| <i>Microdochium nivale</i> 6  | 22.1                                                                |
| <i>Microdochium nivale</i> 7  | 55.0                                                                |
| <i>Microdochium nivale</i> 8  | 17.7                                                                |
| <i>Microdochium nivale</i> 9  | 17.7                                                                |
| <i>Microdochium nivale</i> 10 | 44.6                                                                |
| <i>Microdochium nivale</i> 11 | 14.3                                                                |
| <i>Microdochium nivale</i> 12 | 21.2                                                                |
| <i>Microdochium nivale</i> 13 | 26.4                                                                |
| <i>Microdochium nivale</i> 14 | 23.4                                                                |
| <i>Microdochium nivale</i> 15 | 24.7                                                                |
| <i>Microdochium nivale</i> 16 | 42.4                                                                |
| <i>Microdochium nivale</i> 17 | 70.6                                                                |
| <i>Microdochium nivale</i> 18 | 72.7                                                                |
| <i>Microdochium nivale</i> 19 | 75.8                                                                |
| <i>Microdochium nivale</i> 20 | 52.4                                                                |
| <i>Microdochium nivale</i> 21 | 11.7                                                                |
