# Supplementary material for: Differential Activity of the Extracellular Phenoloxidases in Different Strains of the Phytopathogenic Fungus, Microdochium nivale
Source: MDPI journal article supplement (doi:10.3390/jof8090918), 2022-08-29
Supplement: s1 [file s1]

Table S1. Collection IDs of the *Microdochium nivale* strains used in this study.

| Strain №                      | Strain ID in the collection |
|-------------------------------|-----------------------------|
| <i>Microdochium nivale</i> 1  | F00608                      |
| <i>Microdochium nivale</i> 2  | F00609                      |
| <i>Microdochium nivale</i> 3  | F00610                      |
| <i>Microdochium nivale</i> 4  | F00611                      |
| <i>Microdochium nivale</i> 5  | F00612                      |
| <i>Microdochium nivale</i> 6  | F00613                      |
| <i>Microdochium nivale</i> 7  | F00614                      |
| <i>Microdochium nivale</i> 8  | F00615                      |
| <i>Microdochium nivale</i> 9  | F00616                      |
| <i>Microdochium nivale</i> 10 | F00617                      |
| <i>Microdochium nivale</i> 11 | F00618                      |
| <i>Microdochium nivale</i> 12 | F00619                      |
| <i>Microdochium nivale</i> 13 | F00620                      |
| <i>Microdochium nivale</i> 14 | F00621                      |
| <i>Microdochium nivale</i> 15 | F00622                      |
| <i>Microdochium nivale</i> 16 | F00623                      |
| <i>Microdochium nivale</i> 17 | F00624                      |
| <i>Microdochium nivale</i> 18 | F00625                      |
| <i>Microdochium nivale</i> 19 | F00626                      |
| <i>Microdochium nivale</i> 20 | F00627                      |
| <i>Microdochium nivale</i> 21 | F00628                      |
